# Supplementary material for: Construction of highly dispersed Au active sites by ice photochemical polishing for efficient acetylene hydrochlorination
Source: Royal Society of Chemistry journal article supplement (doi:10.1039/d1nj05120b), 2022-01-01
Supplement: d1nj05120b1.pdf [file d1nj05120b1.pdf]

**Electronic Supplementary Information (ESI) for New Journal of  
Chemistry**

**Construction of highly dispersed Au active sites by ice  
photochemical polishing for efficient acetylene hydrochlorination**

Lisha Yao,<sup>a</sup> Haiyang Zhang,<sup>\*a</sup> Yanqin Li,<sup>a</sup> Miaomiao Zhang,<sup>a</sup> Feng Li,<sup>a</sup> Linfeng Li,<sup>a</sup> and Jinli Zhang <sup>\*a,b</sup>

<sup>a</sup> School of Chemistry and Chemical Engineering/Key Laboratory for Green Processing of Chemical Engineering of Xinjiang Bingtuan, Shihezi University, Shihezi 832000 (P.R. China);  
E-mail: zhy198722@163.com (H.Y. Zhang).

<sup>b</sup> School of Chemical Engineering and Technology, Tianjin University, Tianjin 300072 (P.R. China); E-mail: zhangjinli@tju.edu.cn (J.L. Zhang).

\*Corresponding authors: Tel: +86-993-2057-277;

E-mail: zhy198722@163.com (H.Y. Zhang), and zhangjinli@tju.edu.cn (J.L. Zhang).

## Captions of Figures and Tables

**Fig. S1** Schematic of the microreactor for acetylene hydrochlorination.

**Fig. S2** Acetylene conversion rate (a) and selectivity to VCM (b) over the prepared Au-based catalysts.

Reaction conditions: temperature = 180 °C, GHSV (C<sub>2</sub>H<sub>2</sub>) = 1200 h<sup>-1</sup>, and V<sub>HCl</sub>/V<sub>C<sub>2</sub>H<sub>2</sub></sub> = 1.15.

**Fig. S3** Acetylene conversion rate (a) and selectivity to VCM (b) over the prepared Au/AC-F<sub>x</sub>I<sub>y</sub> catalysts.

Reaction conditions: temperature = 180 °C, GHSV (C<sub>2</sub>H<sub>2</sub>) = 1200 h<sup>-1</sup>, and V<sub>HCl</sub>/V<sub>C<sub>2</sub>H<sub>2</sub></sub> = 1.15.

**Fig. S4** Nitrogen adsorption and desorption isotherms of unreacted (a) and reacted (b) Au/AC-F<sub>x</sub>I<sub>y</sub> catalysts.

**Fig. S5** TG/DTG curves of the unreacted and reacted Au/AC-F<sub>x</sub>I<sub>y</sub> catalysts.

**Fig. S6** XRPD patterns of the unreacted (a) and reacted (b) Au/AC-F<sub>x</sub>I<sub>y</sub> catalysts.

**Fig. S7** TEM images of the unreacted (left) and reacted (right) catalysts: AC (a, b), Au/AC-F<sub>1</sub>I<sub>0</sub> (c, d), Au/AC-F<sub>0.5</sub>I<sub>0.5</sub> (e, f), Au/AC-F<sub>1.5</sub>I<sub>1.5</sub> (g, h), Au/AC-F<sub>2</sub>I<sub>2</sub> (i, j), and Au/AC-F<sub>0</sub>I<sub>1</sub> (k, l); about 150 particles were measured for the unreacted and reacted samples.

**Fig. S8** HAADF-STEM images of the unreacted catalysts: Au/AC-F<sub>1</sub>I<sub>1</sub> (a) and Au/AC-F<sub>1.5</sub>I<sub>1.5</sub> (b).

**Fig. S9** The constraint relationships between catalytic activity and Au nanoparticle size.

**Fig. S10** TPR profiles of the unreacted Au/AC-F<sub>x</sub>I<sub>y</sub> catalysts.

**Fig. S11** Au 4f XPS spectra and valence distribution of the unreacted (a) and reacted (b) catalysts.

**Fig. S12** Changes in the Au<sup>III</sup> content of unreacted Au/AC-F<sub>x</sub>I<sub>y</sub> catalysts after different times of UV light irradiation.

**Fig. S13** Wavelet transform plots analysis of Au foil (a), AuCl (b), AuCl<sub>3</sub> (c), Au/AC (d), and Au/AC-F<sub>1</sub>I<sub>1</sub> (e).

**Fig. S14** UV-vis adsorption spectra of the Au solution.

**Fig. S15** C<sub>2</sub>H<sub>2</sub>-TPD (a) and HCl-TPD (b) profiles of the unreacted Au/AC-F<sub>x</sub>I<sub>y</sub> catalysts.

**Table S1** The physical properties of different Au-based catalysts.

**Table S2** The amount of coke deposition on the catalysts.

**Table S3** The average particle size determined from XRPD patterns by Scherrer equation.

**Table S4** EXAFS fitting parameters at the Au L<sub>3</sub>-edge for various samples ( $S_0^2=0.81$ )

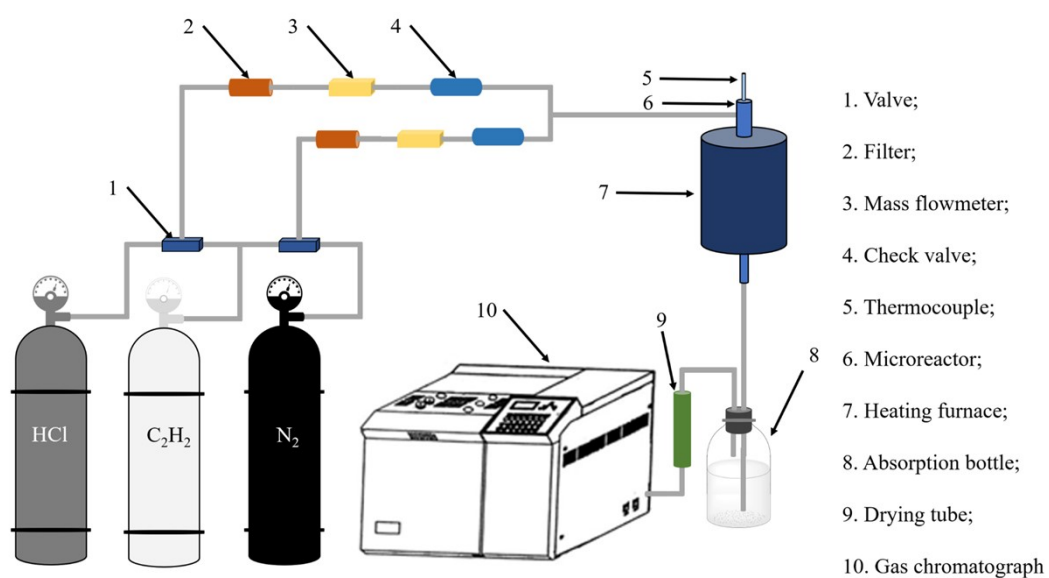

**Fig. S1** Schematic of the microreactor for acetylene hydrochlorination.

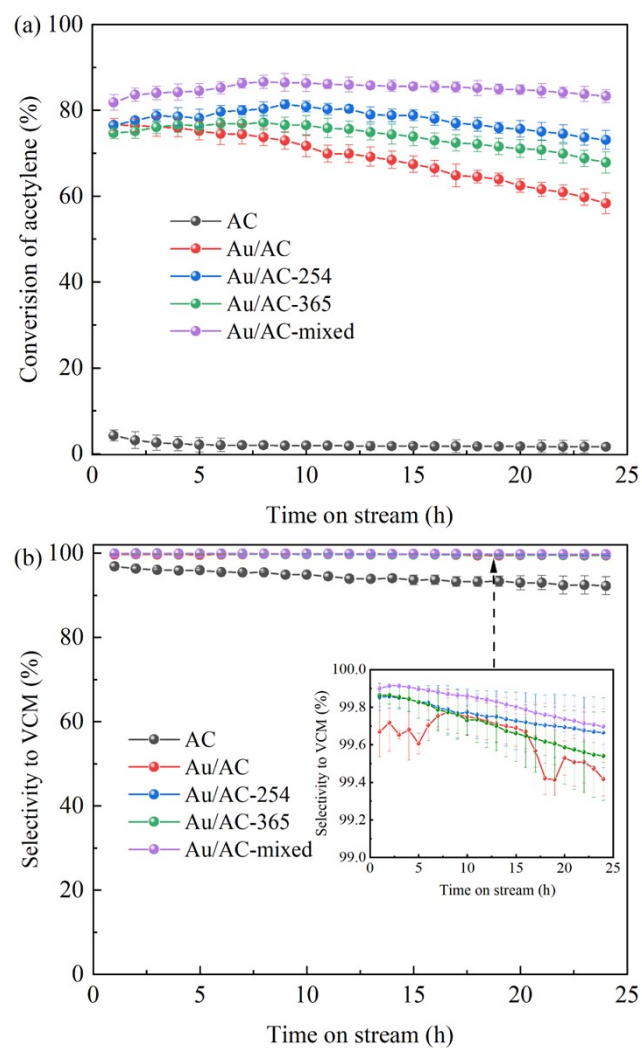

**Fig. S2** Acetylene conversion rate (a) and selectivity to VCM (b) over the prepared Au-based catalysts.

Reaction conditions: temperature = 180 °C, GHSV (C<sub>2</sub>H<sub>2</sub>) = 1200 h<sup>-1</sup>, and  $V_{\text{HCl}}/V_{\text{C}_2\text{H}_2} = 1.15$ .

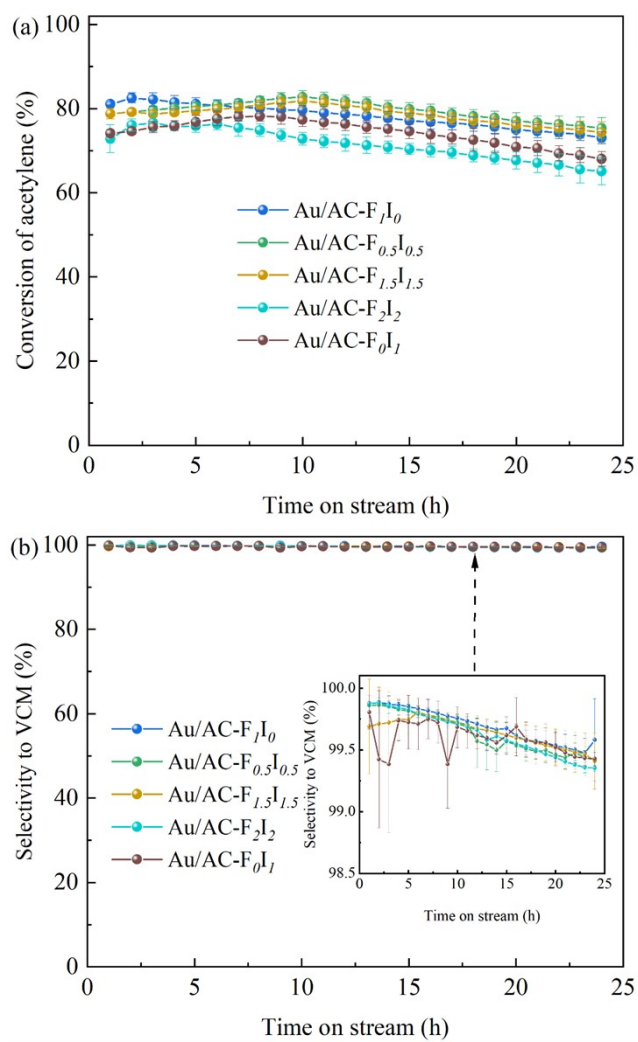

**Fig. S3** Acetylene conversion rate (a) and selectivity to VCM (b) over the prepared Au/AC-F<sub>x</sub>I<sub>y</sub> catalysts.

Reaction conditions: temperature = 180 °C, GHSV (C<sub>2</sub>H<sub>2</sub>) = 1200 h<sup>-1</sup>, and V<sub>HCl</sub>/V<sub>C<sub>2</sub>H<sub>2</sub></sub> = 1.15.

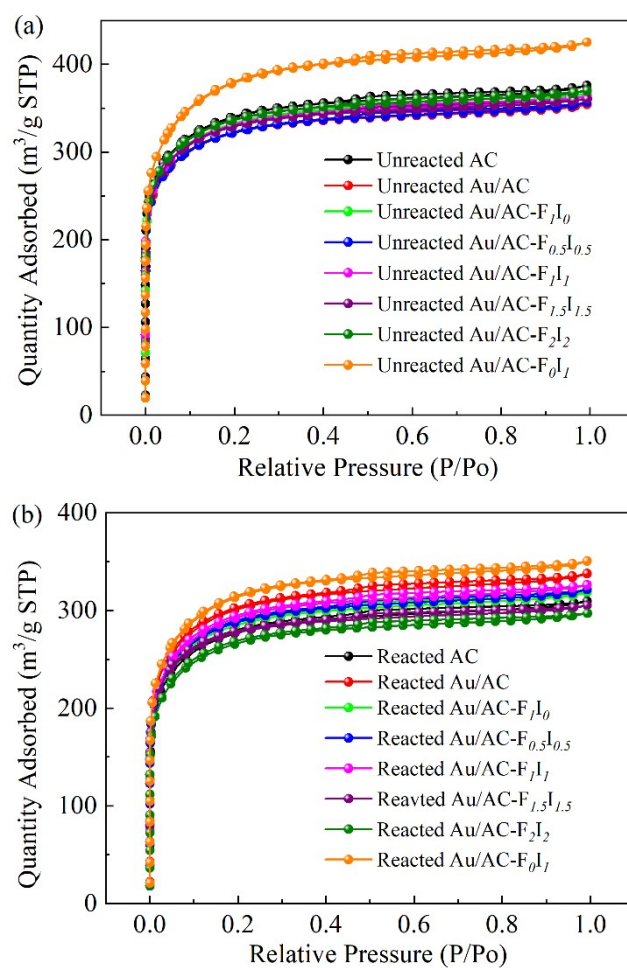

**Fig. S4** Nitrogen adsorption and desorption isotherms of unreacted (a) and reacted (b) Au/AC-F<sub>x</sub>I<sub>y</sub> catalysts.

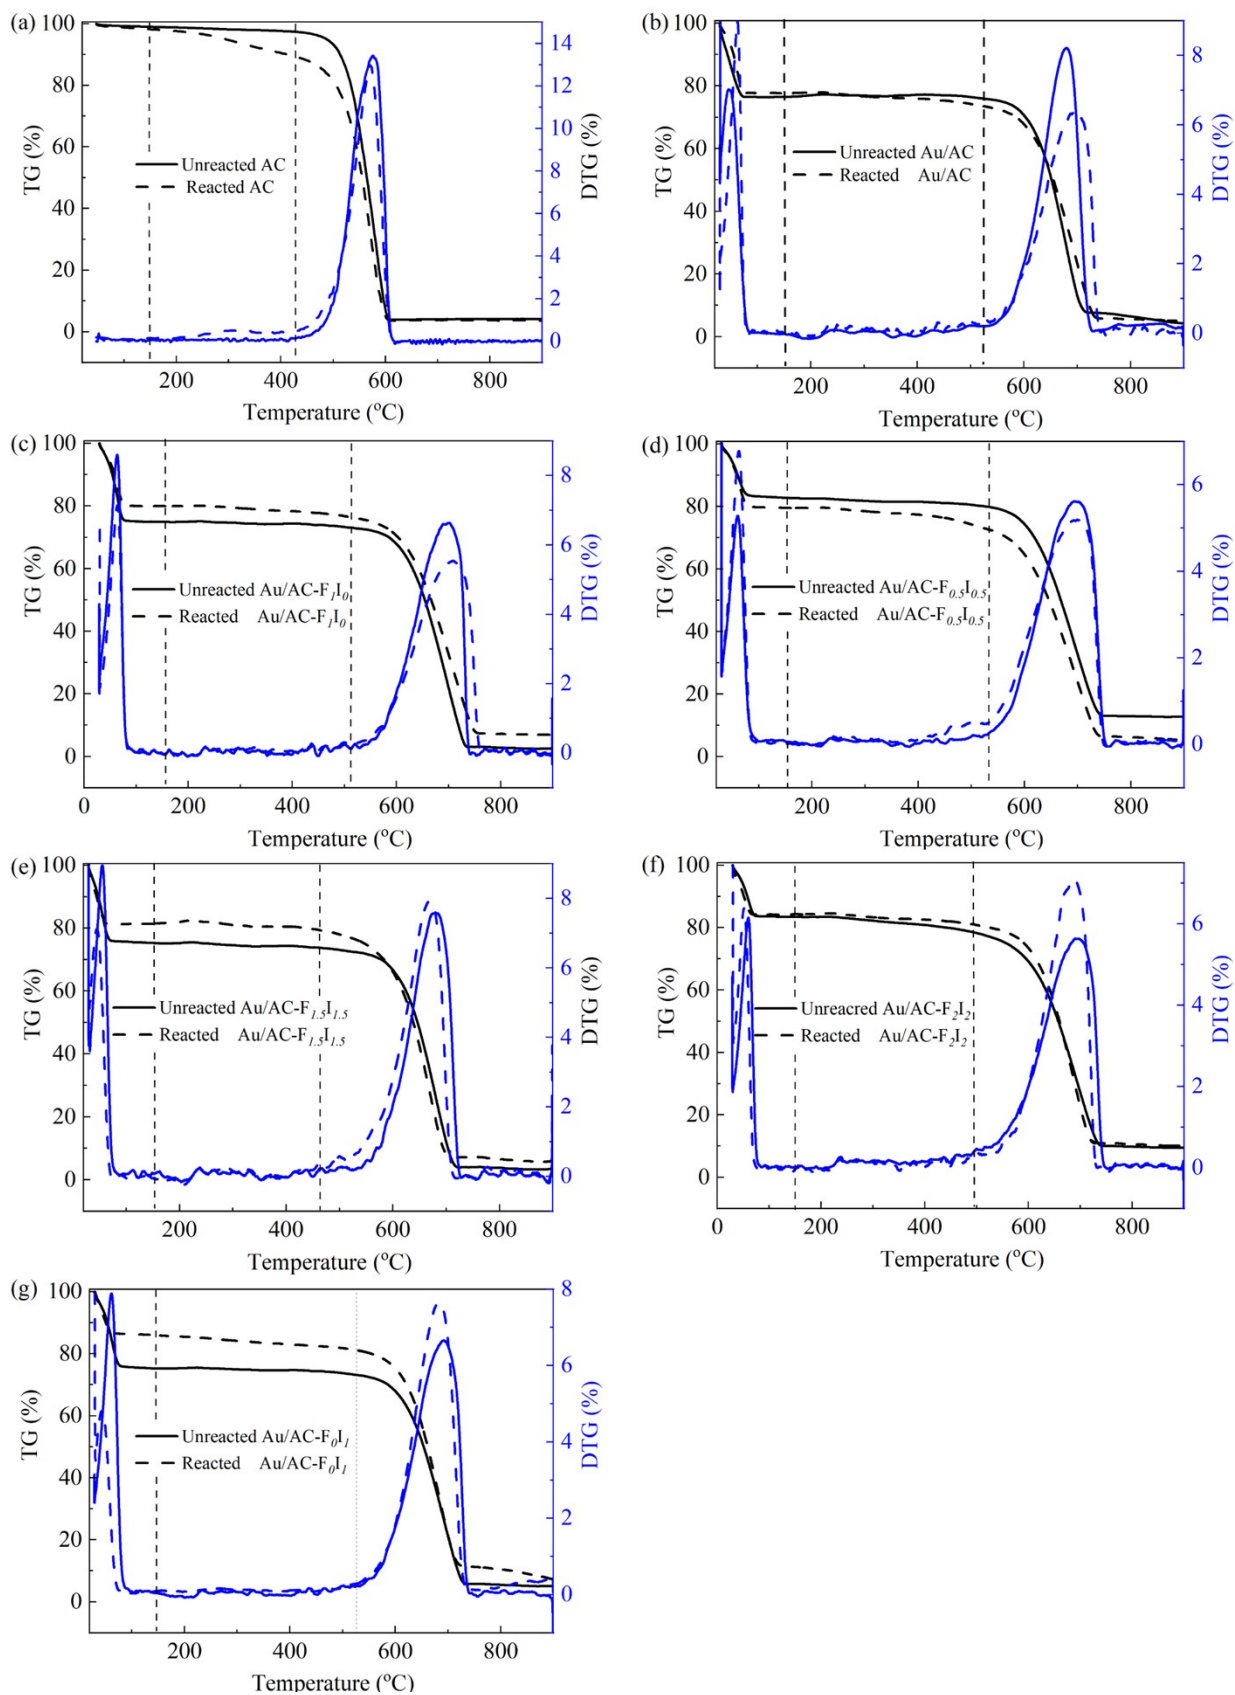

**Fig. S5** TG/DTG curves of the unreacted and reacted Au/AC-F<sub>x</sub>I<sub>y</sub> catalysts.



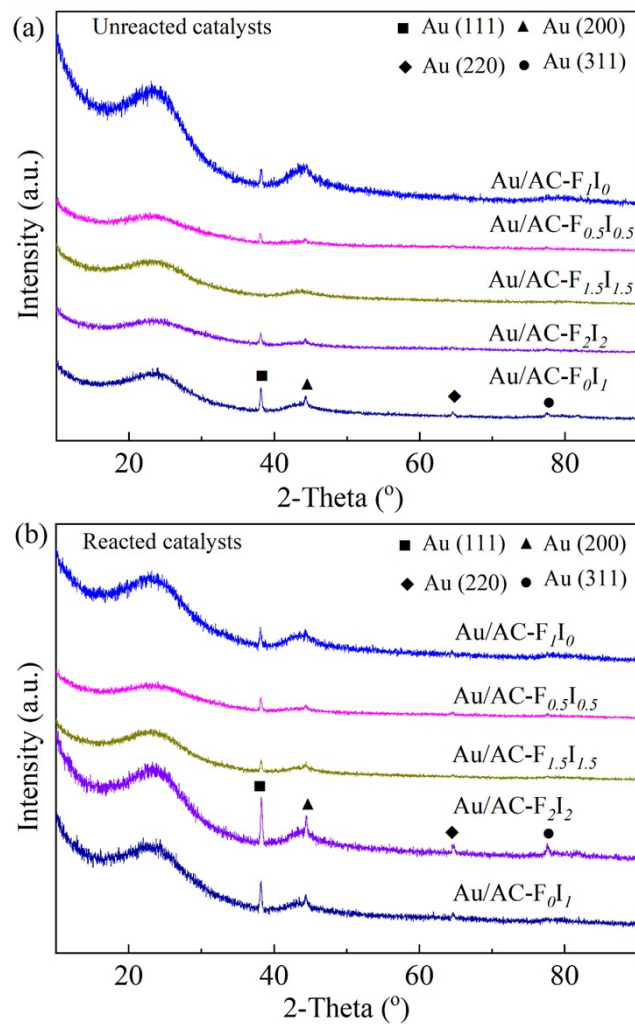

**Fig. S6** XRPD patterns of the unreacted (a) and reacted (b) Au/AC-F<sub>x</sub>I<sub>y</sub> catalysts.

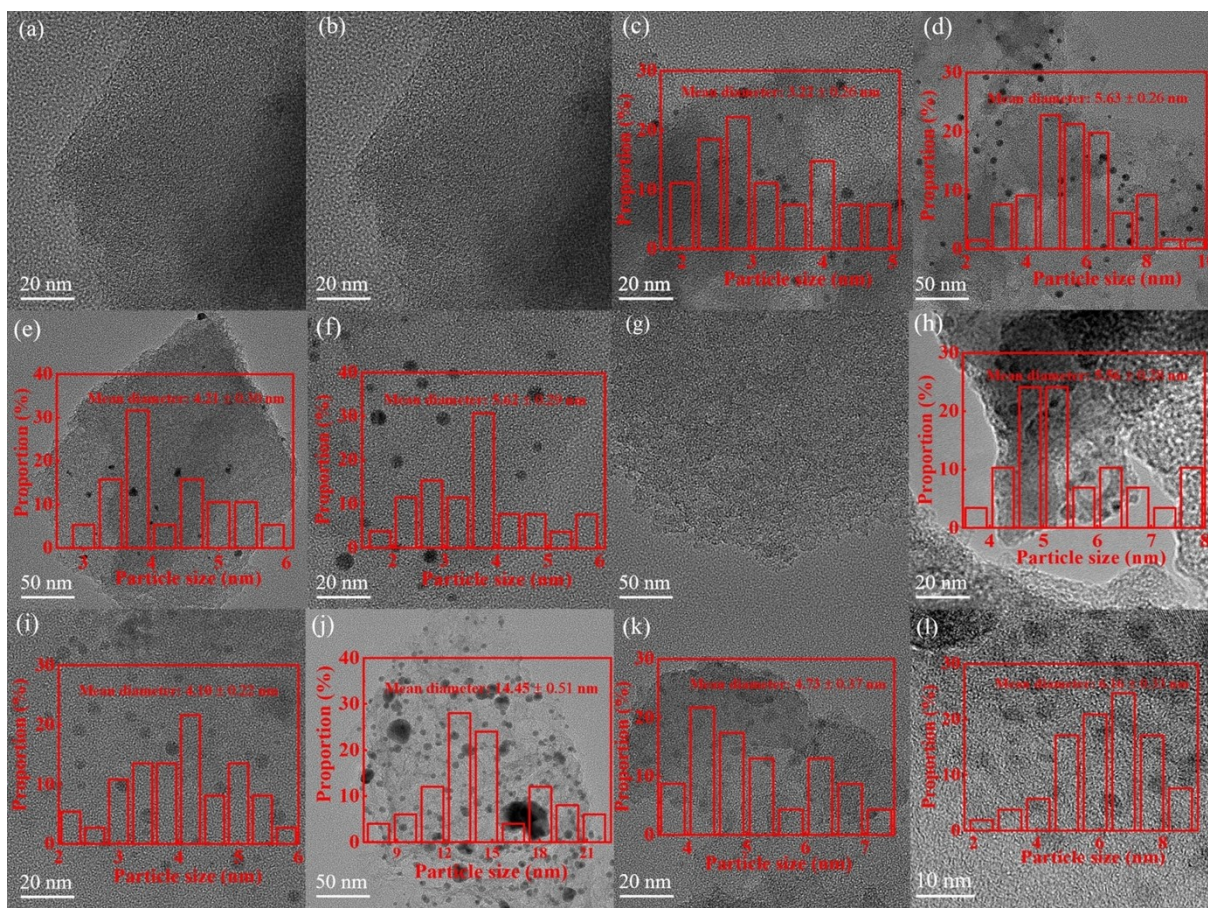

**Fig. S7** TEM images of the unreacted (left) and reacted (right) catalysts: AC (a, b), Au/AC-F<sub>1</sub>I<sub>0</sub> (c, d), Au/AC-F<sub>0.5</sub>I<sub>0.5</sub> (e, f), Au/AC-F<sub>1.5</sub>I<sub>1.5</sub> (g, h), Au/AC-F<sub>2</sub>I<sub>2</sub> (i, j), and Au/AC-F<sub>0</sub>I<sub>1</sub> (k, l); about 150 particles were measured for the unreacted and reacted samples.

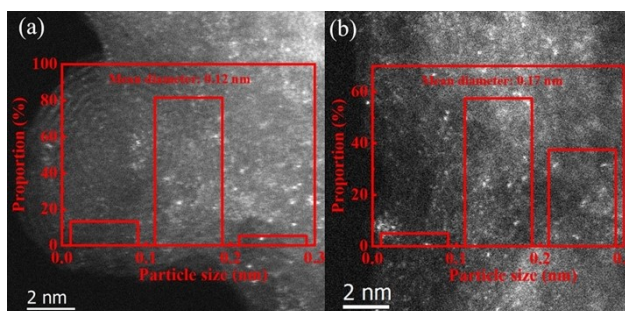

**Fig. S8** HAADF-STEM images of the unreacted catalysts: Au/AC-F<sub>1</sub>I<sub>1</sub> (a) and Au/AC-F<sub>1.5</sub>I<sub>1.5</sub> (b).

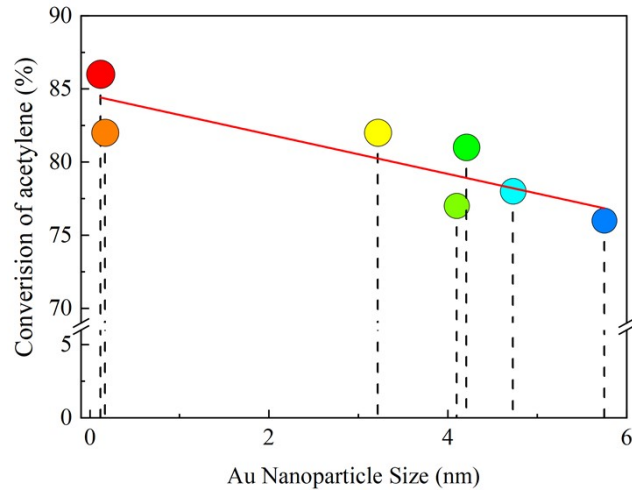

**Fig. S9** The constraint relationships between catalytic activity and Au nanoparticle size.

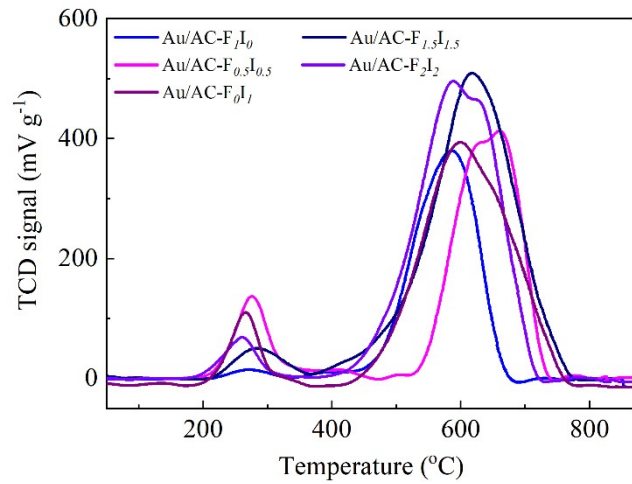

**Fig. S10** TPR profiles of the unreacted Au/AC-F<sub>*I*</sub> catalysts.

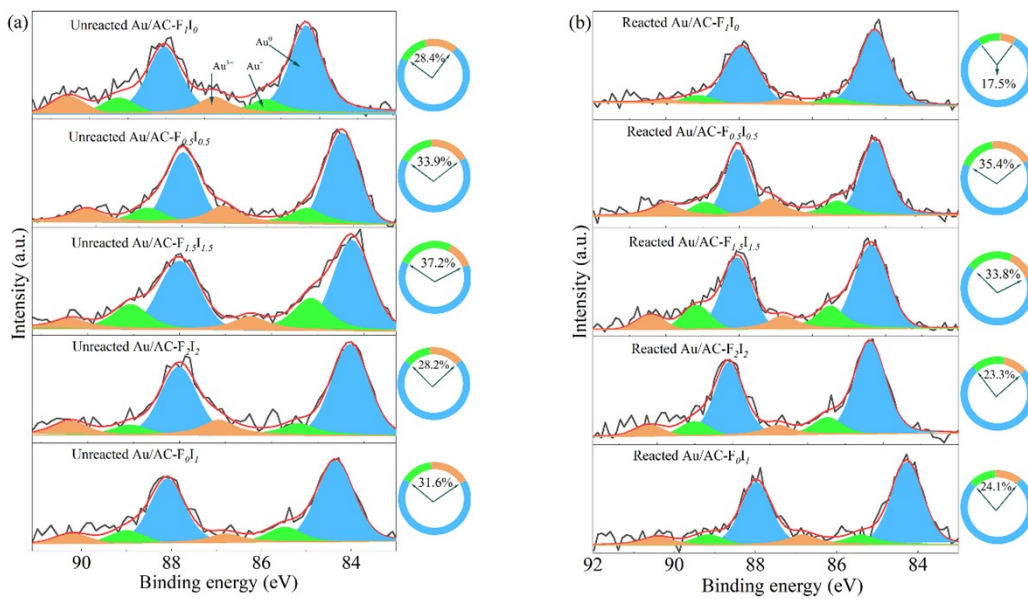

**Fig. S11** Au 4f XPS spectra and valence distribution of the unreacted (a) and reacted (b) catalysts.

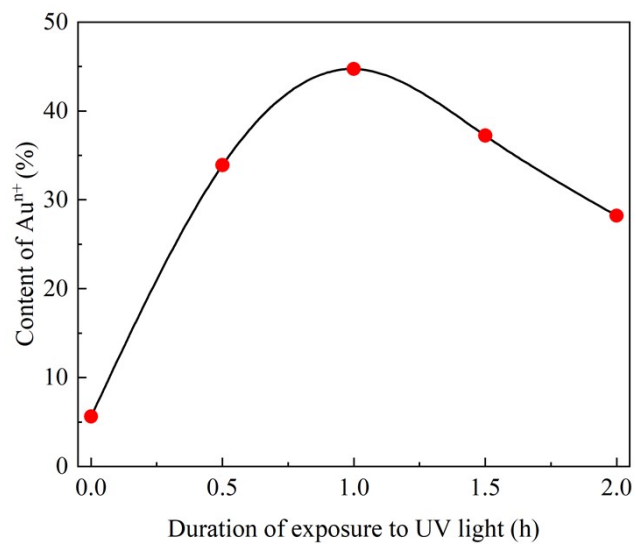

**Fig. S12** Changes in the Au<sup>3+</sup> content of unreacted Au/AC-F<sub>x</sub>I<sub>y</sub> catalysts after different times of UV light irradiation.



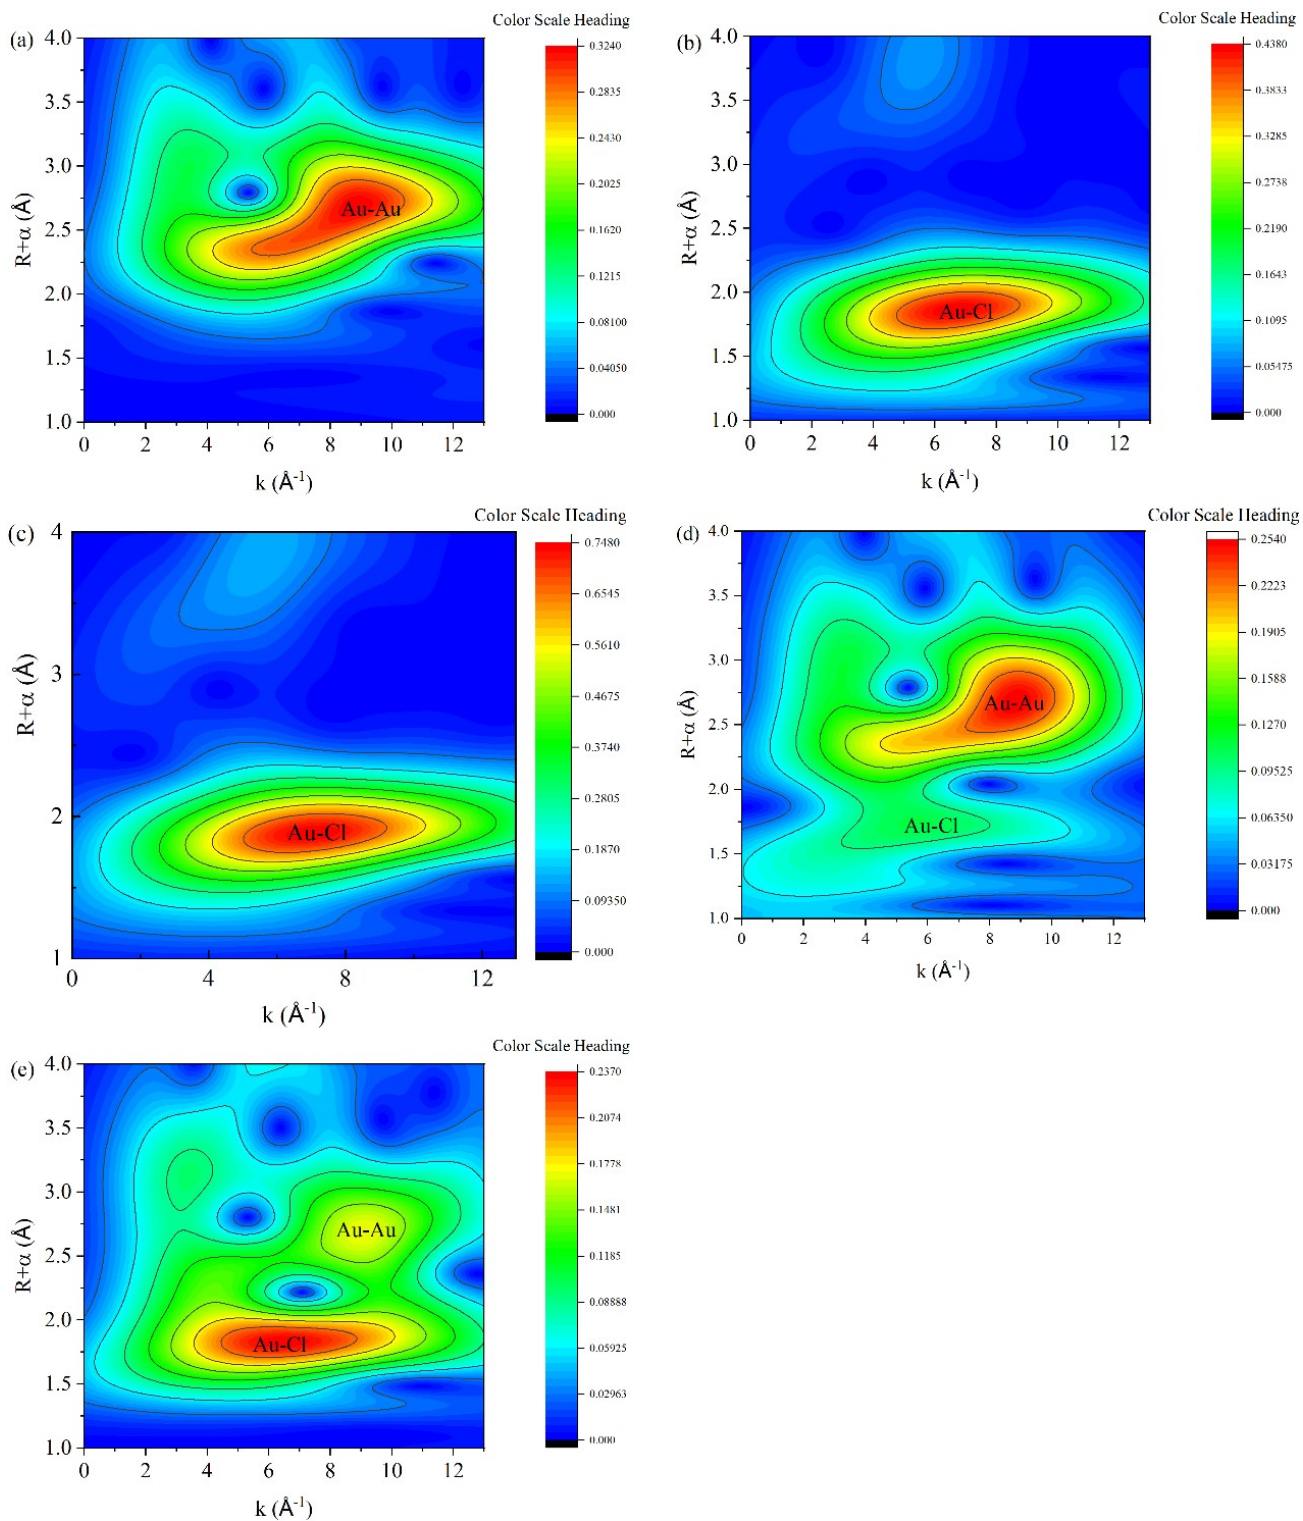

**Fig. S13** Wavelet transform plots analysis of Au foil (a), AuCl (b), AuCl<sub>3</sub> (c), Au/AC (d), and Au/AC-F<sub>1</sub>I<sub>1</sub> (e).

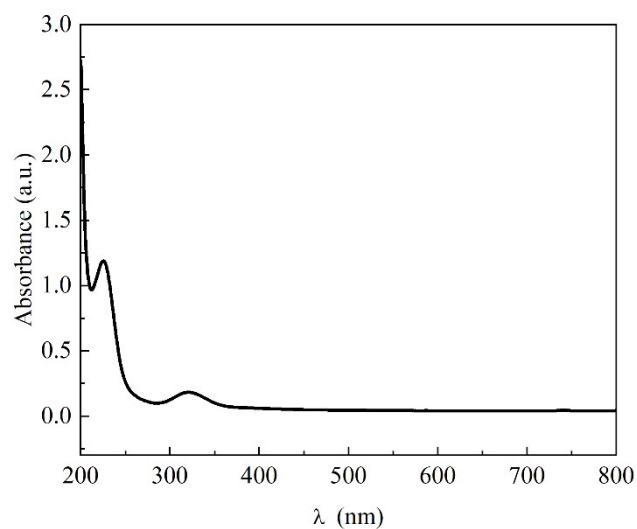

**Fig. S14** UV-vis adsorption spectra of the Au solution.

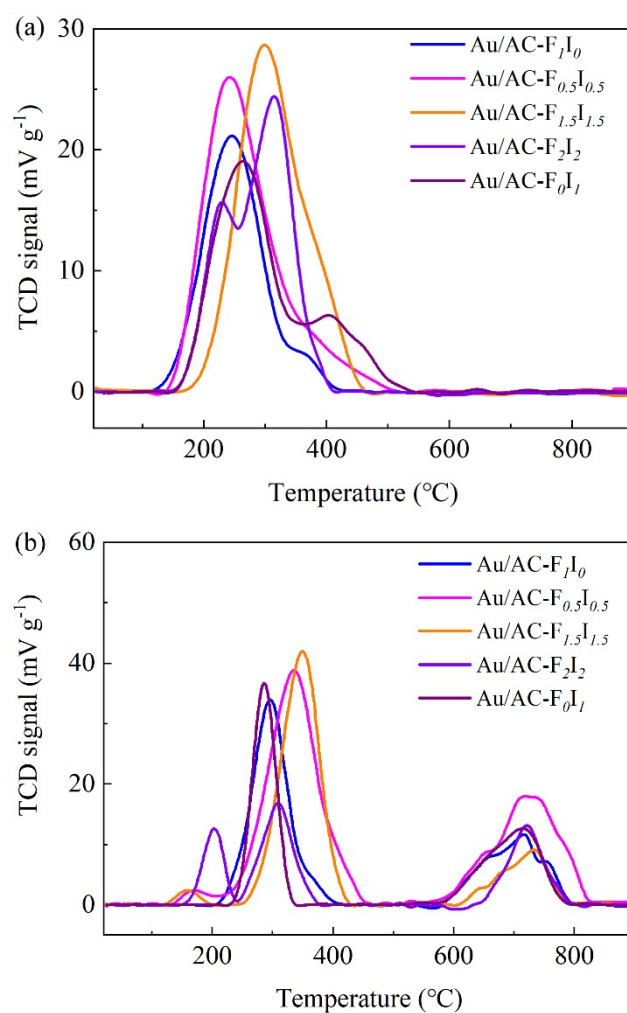

**Fig. S15** C<sub>2</sub>H<sub>2</sub>-TPD (a) and HCl-TPD (b) profiles of the unreacted Au/AC-F<sub>x</sub>I<sub>y</sub> catalysts.

**Table S1** The physical properties of the different Au-based catalysts.

| Samples                                           | $S_{\text{BET}}^{\text{a}}$<br>( $\text{m}^2 \text{g}^{-1}$ ) | $\Delta S_{\text{BET}}$<br>(%) | $S_{\text{micro.}}^{\text{b}}$<br>( $\text{m}^2 \text{g}^{-1}$ ) | $S_{\text{micro.}}/S_{\text{BET}}$<br>(%) | $S_{\text{ext.}}^{\text{c}}$<br>( $\text{m}^2 \text{g}^{-1}$ ) | $S_{\text{ext.}}/S_{\text{BET}}$<br>(%) | $V_{\text{p}}^{\text{d}}$<br>( $\text{cm}^3 \text{g}^{-1}$ ) | $\Delta V_{\text{p}}$ (%) | $V_{\text{micro.}}^{\text{e}}$<br>( $\text{cm}^3 \text{g}^{-1}$ ) | $V_{\text{ext.}}$<br>( $\text{cm}^3 \text{g}^{-1}$ ) | $D_{\text{pore}}^{\text{f}}$<br>(nm) |
|---------------------------------------------------|---------------------------------------------------------------|--------------------------------|------------------------------------------------------------------|-------------------------------------------|----------------------------------------------------------------|-----------------------------------------|--------------------------------------------------------------|---------------------------|-------------------------------------------------------------------|------------------------------------------------------|--------------------------------------|
| Unreacted AC                                      | 1143                                                          | 31.8                           | 719                                                              | 62.9                                      | 424                                                            | 37.11                                   | 0.59                                                         | 35.6                      | 0.35                                                              | 0.24                                                 | 2.19                                 |
| Reacted AC                                        | 779                                                           |                                | 447                                                              | 57.4                                      | 332                                                            | 42.6                                    | 0.38                                                         |                           | 0.27                                                              | 0.11                                                 | 2.21                                 |
| Unreacted Au/AC                                   | 987                                                           | 25.9                           | 620                                                              | 62.8                                      | 367                                                            | 37.2                                    | 0.55                                                         | 23.6                      | 0.33                                                              | 0.22                                                 | 2.22                                 |
| Reacted Au/AC                                     | 731                                                           |                                | 436                                                              | 59.6                                      | 295                                                            | 40.4                                    | 0.42                                                         |                           | 0.23                                                              | 0.19                                                 | 2.24                                 |
| Unreacted Au/AC-F <sub>1</sub> I <sub>0</sub>     | 1020                                                          | 13.7                           | 624                                                              | 61.2                                      | 396                                                            | 38.8                                    | 0.54                                                         | 13.0                      | 0.33                                                              | 0.21                                                 | 2.21                                 |
| Reacted Au/AC-F <sub>1</sub> I <sub>0</sub>       | 880                                                           |                                | 518                                                              | 58.9                                      | 362                                                            | 41.1                                    | 0.47                                                         |                           | 0.28                                                              | 0.19                                                 | 2.24                                 |
| Unreacted Au/AC-F <sub>0.5</sub> I <sub>0.5</sub> | 989                                                           | 10.0                           | 613                                                              | 62.0                                      | 376                                                            | 38.0                                    | 0.56                                                         | 10.7                      | 0.34                                                              | 0.22                                                 | 2.21                                 |
| Reacted Au/AC-F <sub>0.5</sub> I <sub>0.5</sub>   | 890                                                           |                                | 517                                                              | 58.1                                      | 373                                                            | 41.9                                    | 0.50                                                         |                           | 0.28                                                              | 0.22                                                 | 2.23                                 |
| Unreacted Au/AC-F <sub>1</sub> I <sub>1</sub>     | 1013                                                          | 4.1                            | 639                                                              | 63.1                                      | 374                                                            | 36.9                                    | 0.56                                                         | 5.4                       | 0.34                                                              | 0.22                                                 | 2.21                                 |
| Reacted Au/AC-F <sub>1</sub> I <sub>1</sub>       | 971                                                           |                                | 611                                                              | 62.9                                      | 360                                                            | 37.1                                    | 0.53                                                         |                           | 0.32                                                              | 0.21                                                 | 2.23                                 |
| Unreacted Au/AC-F <sub>1.5</sub> I <sub>1.5</sub> | 1008                                                          | 7.6                            | 639                                                              | 63.4                                      | 369                                                            | 36.6                                    | 0.55                                                         | 7.3                       | 0.34                                                              | 0.21                                                 | 2.21                                 |
| Reacted Au/AC-F <sub>1.5</sub> I <sub>1.5</sub>   | 931                                                           |                                | 573                                                              | 61.5                                      | 358                                                            | 38.5                                    | 0.51                                                         |                           | 0.29                                                              | 0.22                                                 | 2.22                                 |
| Unreacted Au/AC-F <sub>2</sub> I <sub>2</sub>     | 1033                                                          | 20.3                           | 646                                                              | 62.5                                      | 387                                                            | 37.5                                    | 0.57                                                         | 19.3                      | 0.34                                                              | 0.23                                                 | 2.22                                 |
| Reacted Au/AC-F <sub>2</sub> I <sub>2</sub>       | 823                                                           |                                | 472                                                              | 57.4                                      | 351                                                            | 42.6                                    | 0.46                                                         |                           | 0.25                                                              | 0.21                                                 | 2.23                                 |
| Unreacted Au/AC-F <sub>0</sub> I <sub>1</sub>     | 1043                                                          | 17.1                           | 669                                                              | 64.1                                      | 374                                                            | 35.9                                    | 0.55                                                         | 14.5                      | 0.32                                                              | 0.23                                                 | 2.21                                 |
| Reacted Au/AC-F <sub>0</sub> I <sub>1</sub>       | 865                                                           |                                | 531                                                              | 61.4                                      | 334                                                            | 38.6                                    | 0.47                                                         |                           | 0.29                                                              | 0.18                                                 | 2.22                                 |

[a]  $S_{\text{BET}}$ : BET specific surface area; [b] t-plot micropore area; [c] t-plot external surface area; [d]  $V_{\text{p}}$ : total pore volume, volume at  $p/p_0 = 0.98$ ;

[e] t-plot micropore volume; [f] Adsorption average pore width (4V/A) by BET.

**Table S2** The amount of coke deposition on the catalysts.

| Samples                                 | Amount of coke deposition (%) |
|-----------------------------------------|-------------------------------|
| AC                                      | 8.1                           |
| Au/AC                                   | 4.2                           |
| Au/AC-F <sub>1</sub> I <sub>0</sub>     | 2.6                           |
| Au/AC-F <sub>0.5</sub> I <sub>0.5</sub> | 1.3                           |
| Au/AC-F <sub>1</sub> I <sub>1</sub>     | 0.6                           |
| Au/AC-F <sub>1.5</sub> I <sub>1.5</sub> | 1.2                           |
| Au/AC-F <sub>2</sub> I <sub>2</sub>     | 2.0                           |
| Au/AC-F <sub>0</sub> I <sub>1</sub>     | 2.5                           |

**Table S3** The average particle size determined from XRPD patterns by Scherrer equation.

| Catalysts                               | Particle size (nm) |       |
|-----------------------------------------|--------------------|-------|
|                                         | Fresh              | Spent |
| Au/AC                                   | 7.6                | 16.4  |
| Au/AC-F <sub>1</sub> I <sub>0</sub>     | 4.8                | 7.6   |
| Au/AC-F <sub>0.5</sub> I <sub>0.5</sub> | 4.6                | 6.7   |
| Au/AC-F <sub>1</sub> I <sub>1</sub>     | < 4.0              | < 4.0 |
| Au/AC-F <sub>1.5</sub> I <sub>1.5</sub> | < 4.0              | 5.6   |
| Au/AC-F <sub>2</sub> I <sub>2</sub>     | 4.3                | 17.1  |
| Au/AC-F <sub>0</sub> I <sub>1</sub>     | 6.8                | 9.4   |



**Table S4** EXAFS fitting parameters at the Au L<sub>3</sub>-edge for various samples ( $S_0^2=0.81$ )

| Sample                              | Shell | $N^a$   | $R(\text{\AA})^b$ | $\sigma^2 \times 10^3 (\text{\AA}^2)^c$ | $\Delta E_0 (\text{eV})^d$ | $R$ factor |
|-------------------------------------|-------|---------|-------------------|-----------------------------------------|----------------------------|------------|
| Au foil                             | Au-Au | 12*     | 2.86±0.01         | 8.4±0.5                                 | 4.1±0.8                    | 0.010      |
| AuCl                                | Au-Cl | 3.0±0.3 | 2.28±0.01         | 3.8±0.6                                 | 10.2±1.2                   | 0.012      |
| AuCl <sub>3</sub>                   | Au-Cl | 4.5±0.2 | 2.29±0.01         | 2.4±0.3                                 | 10.4±0.1                   | 0.005      |
| Au/AC                               | Au-Cl | 0.5±0.1 | 2.26±0.01         | 1.0±0.4                                 | 6.9±3.0                    | 0.006      |
|                                     | Au-Au | 8.1±0.8 | 2.86±0.01         | 7.1±0.6                                 | 4.4±0.9                    |            |
| Au/AC-F <sub>1</sub> I <sub>1</sub> | Au-Cl | 1.4±0.1 | 2.28±0.01         | 1.7±0.8                                 | 10.6±1.4                   | 0.010      |
|                                     | Au-Au | 5.6±0.8 | 2.86±0.01         | 7.5±0.9                                 | 4.1±1.2                    |            |

<sup>a</sup> $N$ : coordination numbers; <sup>b</sup> $R$ : bond distance; <sup>c</sup> $\sigma^2$ : Debye-Waller factors; <sup>d</sup> $\Delta E_0$ : the inner potential correction.  $R$  factor: goodness of fit.
